# Supplementary material for: A “double-sided tape” modifier bridging the TiO2/perovskite buried interface for efficient and stable all-inorganic perovskite solar cells
Source: Royal Society of Chemistry journal article supplement (doi:10.1039/d2ta00389a), 2022-01-01
Supplement: d2ta00389a1.pdf [file d2ta00389a1.pdf]

## Supporting Information

### “Double-Sided Tape” Modifier Bridging TiO<sub>2</sub>/Perovskite Buried Interface for Efficient and Stable All-Inorganic Perovskite Solar Cells

Junjie Ti,<sup>a,1</sup> Jingwei Zhu,<sup>a,1</sup> Benlin He,<sup>\*a</sup> Zhihao Zong,<sup>a</sup> Xinpeng Yao,<sup>a</sup> Rui Tui,<sup>a</sup> Hao

Huang,<sup>d</sup> Cong Chen,<sup>e</sup> Haiyan Chen,<sup>a</sup> Yanyan Duan<sup>c</sup> and Qunwei Tang<sup>\*b</sup>

<sup>a</sup> *School of Materials Science and Engineering, Ocean University of China, 238*

*Songling Road, Qingdao 266100, P.R. China*

<sup>b</sup> *College of Information Science and Technology, Jinan University, 601 Huangpu*

*Avenue West, Guangzhou 510632, P.R. China*

<sup>c</sup> *State Centre for International Cooperation on Designer Low-Carbon and*

*Environmental Material (SCICDLCEM), School of Materials Science and*

*Engineering, Zhengzhou University, Zhengzhou 450001, P.R. China*

<sup>d</sup> *Guangxi Key Laboratory of Processing for Non-ferrous Metals and Featured*

*Materials, School of Resources, Environment and Materials, Guangxi University,*

*Nanning 530004, China*

<sup>e</sup> *College of Materials Science and Engineering & Institute of New Energy and Low-*

*Carbon Technology, Sichuan University, Chengdu 610065, China*

<sup>1</sup> *The authors contributed equally to this work.*

**\* Corresponding Authors.** E-mail: blhe@ouc.edu.cn, tangqunwei@jnu.edu.cn

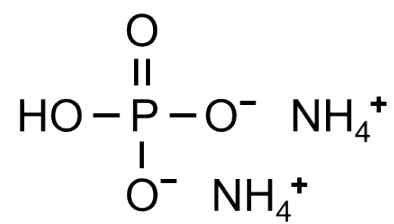

**Fig. S1.** The chemical structural formula of DAP.

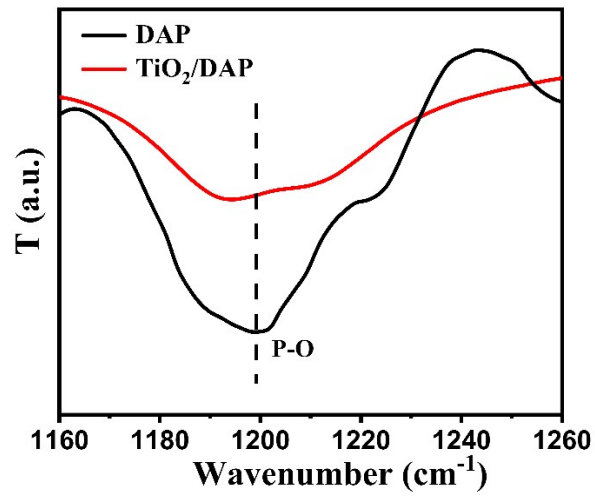

**Fig. S2.** FTIR spectra of P-O bond for DAP and TiO<sub>2</sub>/DAP samples.

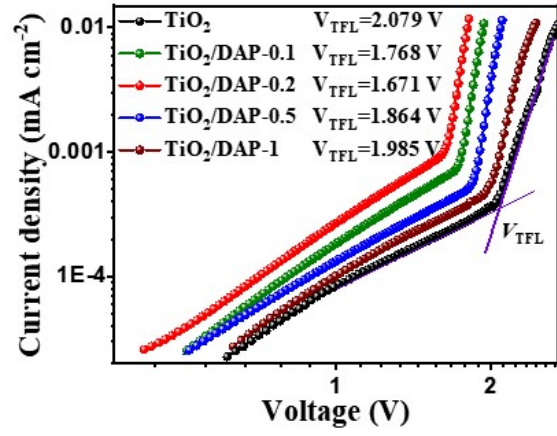

**Fig. S3.** The dark  $J$ - $V$  curves of ETL-only devices with a structure of FTO/TiO<sub>2</sub>/with and without DAP/Carbon.

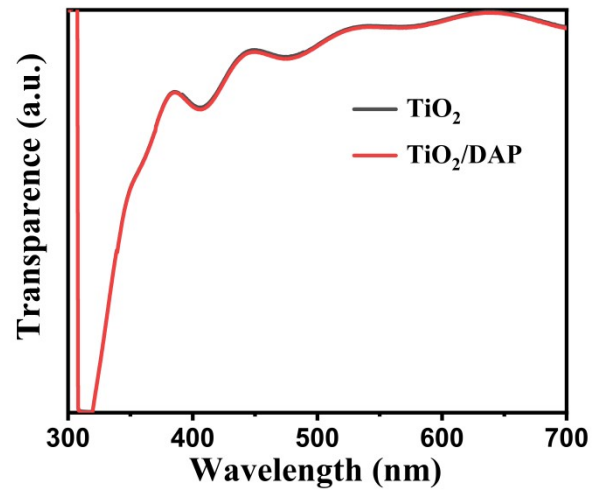

**Fig. S4.** The transmission spectra of TiO<sub>2</sub> and TiO<sub>2</sub>/DAP films.

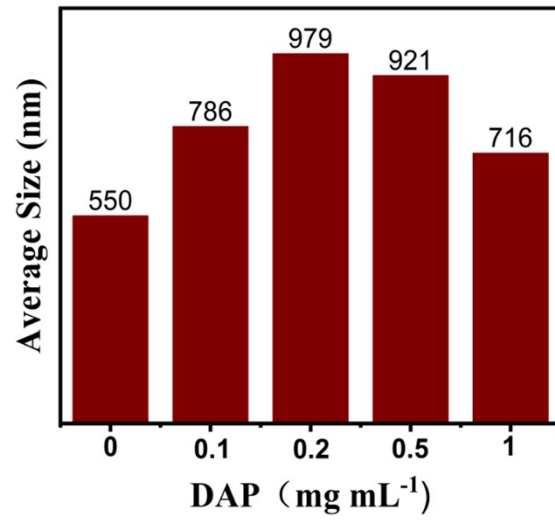

**Fig. S5.** The average grain size distribution statistical histogram of perovskite films deposited on various TiO<sub>2</sub> layers.

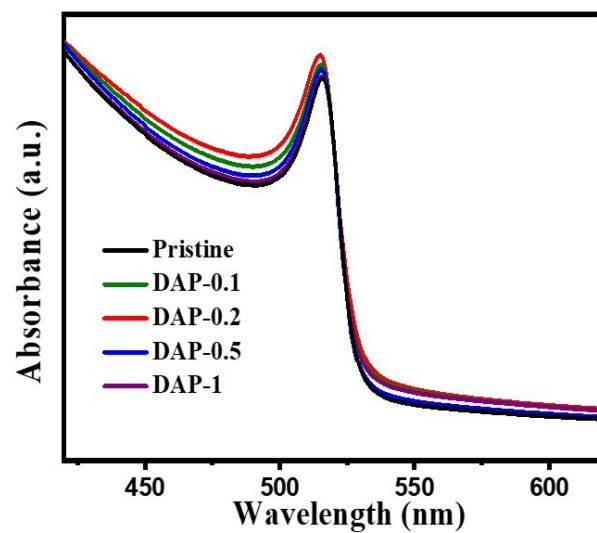

**Fig. S6.** UV-vis absorption spectrums of perovskite films deposited on various TiO<sub>2</sub>

ETLs.

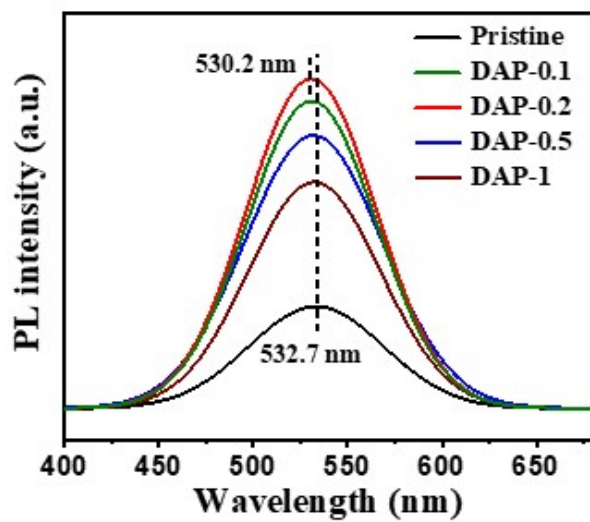

**Fig. S7.** The steady-state PL spectra excited from air side of perovskite films directly deposited on various glass substrates.



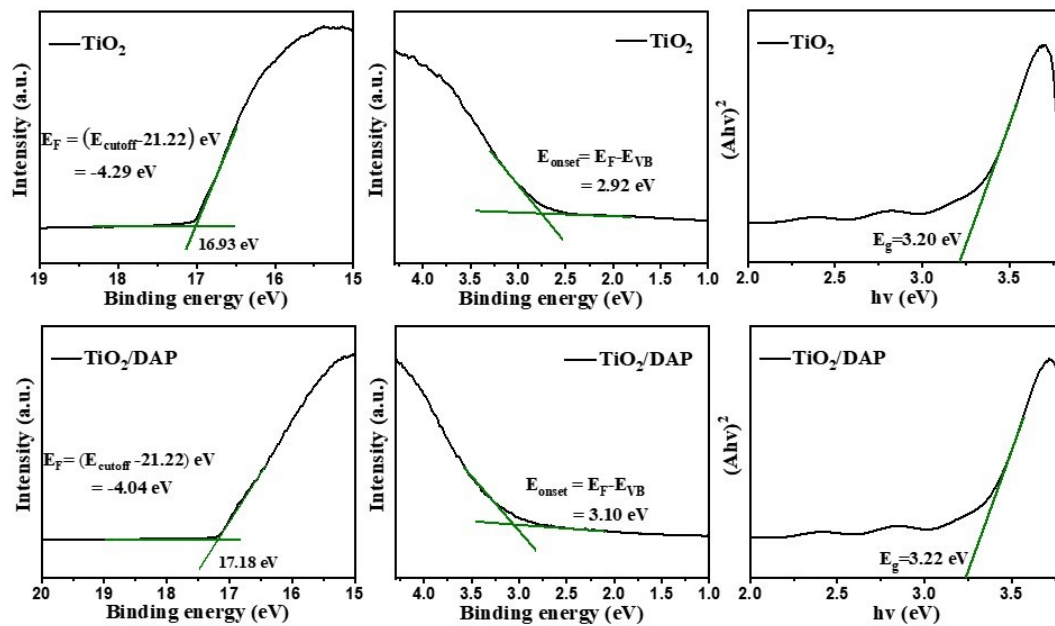

**Fig. S8.** Ultraviolet photoelectron spectra (UPS) and the curves of  $(Ahv)^2$  as a function of  $h\nu$  for various TiO<sub>2</sub> films.

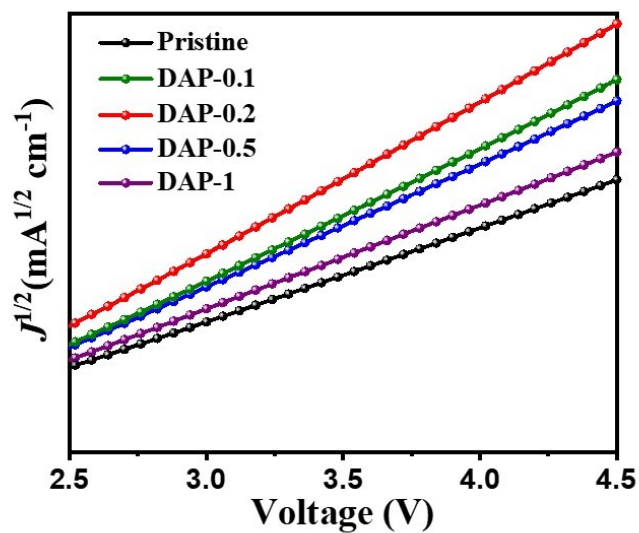

**Fig. S9.** The  $J^{1/2}$ - $V$  curves of electron-only devices with a structure of FTO/TiO<sub>2</sub>/without or with DAP/perovskite/PCBM/carbon.

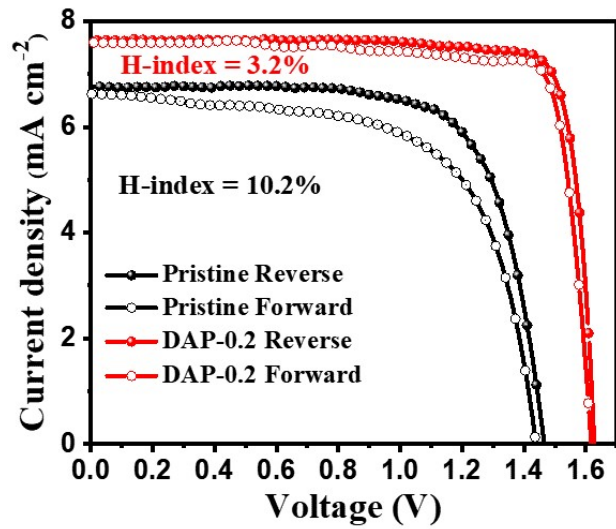

**Fig. S10.** The  $J$ - $V$  curves under forward and reverse scan directions of the control and optimized PSCs.

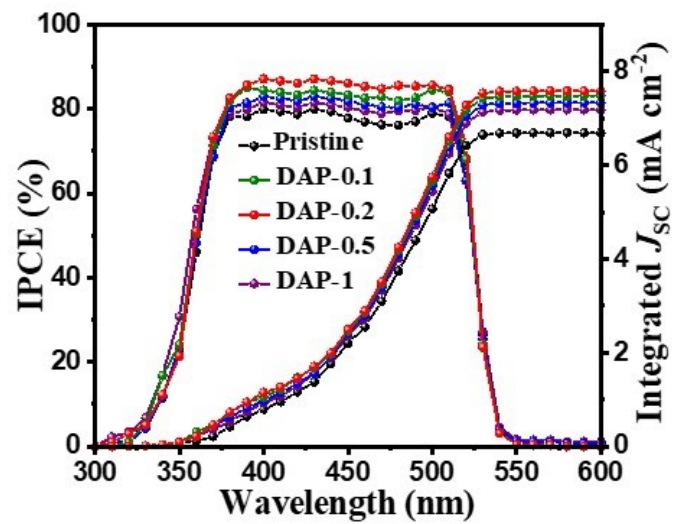

**Fig. S11.** IPCE spectra and integrated current density of various devices.

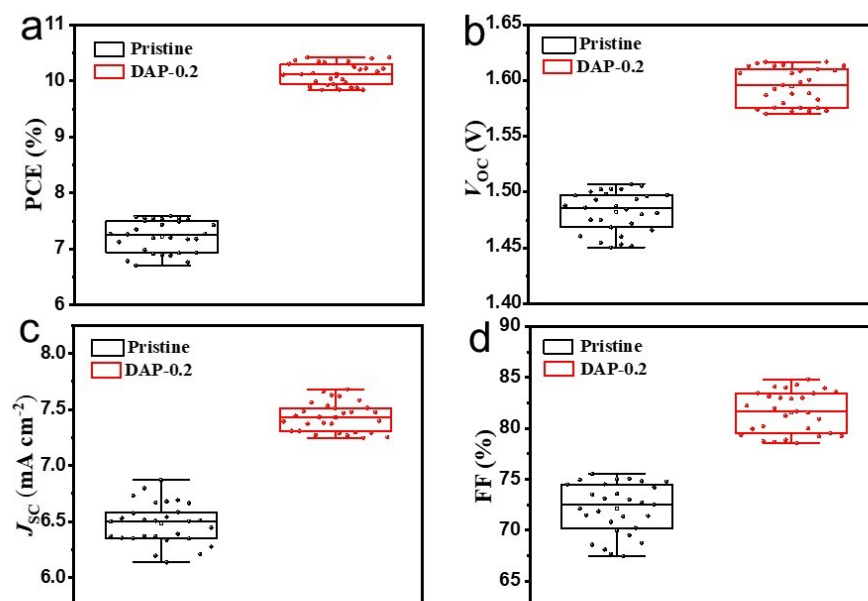

**Fig. S12.** Statistical distribution of (a) PCE, (b)  $V_{oc}$ , (c)  $J_{sc}$  and (d) FF for thirty random control and optimized CsPbBr<sub>3</sub> PSCs.

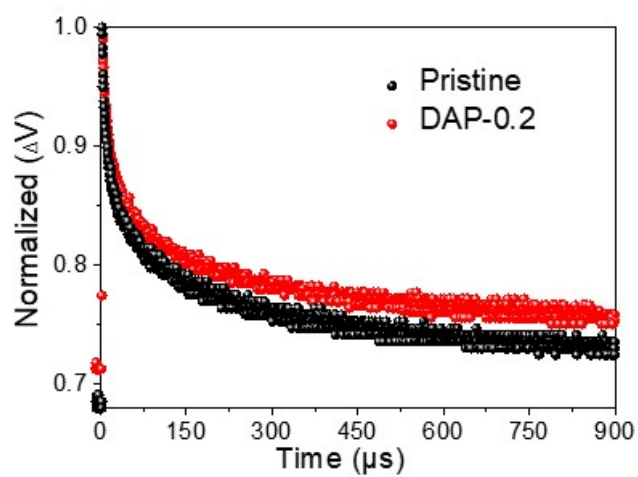

**Fig. S13.** TPV curves of various CsPbBr<sub>3</sub> PSCs under 0.3 sun illumination.

**Table S1.** The electron trap state density of TiO<sub>2</sub> films with and without DAP modification.

| Samples  | $V_{\text{TFL}}$ (V) | $N_{\text{t}}$ ( $10^{17}$ cm <sup>-3</sup> ) |
|----------|----------------------|-----------------------------------------------|
| Pristine | 2.079                | 5.69                                          |
| DAP-0.1  | 1.768                | 4.76                                          |
| DAP-0.2  | 1.671                | 4.52                                          |
| DAP-0.5  | 1.864                | 5.01                                          |
| DAP-1    | 1.985                | 5.37                                          |

**Table S2.** The electron trap state density and electron mobility of CsPbBr<sub>3</sub> films deposited on various TiO<sub>2</sub> ETLs.

| Samples  | $V_{\text{TFL}}$ (V) | $N_t$ ( $10^{16}$ cm <sup>-3</sup> ) | $\mu_e$ ( $10^{-4}$ cm <sup>2</sup> V <sup>-1</sup> s <sup>-2</sup> ) |
|----------|----------------------|--------------------------------------|-----------------------------------------------------------------------|
| Pristine | 1.635                | 2.06                                 | 4.52                                                                  |
| DAP-0.1  | 1.356                | 1.71                                 | 8.41                                                                  |
| DAP-0.2  | 1.291                | 1.62                                 | 11.7                                                                  |
| DAP-0.5  | 1.444                | 1.83                                 | 7.12                                                                  |
| DAP-1    | 1.541                | 1.95                                 | 5.48                                                                  |



**Table S3.** Summary of the parameters of CsPbBr<sub>3</sub> PSCs with champion PCE.

| Devices                                                                                                                                                             | $J_{sc}$<br>(mA cm <sup>-2</sup> ) | $V_{oc}$<br>(V) | FF<br>(%)    | PCE<br>(%)   | Ref.      |
|---------------------------------------------------------------------------------------------------------------------------------------------------------------------|------------------------------------|-----------------|--------------|--------------|-----------|
| FTO/c-TiO <sub>2</sub> /m-TiO <sub>2</sub> /DAP/CsPbBr <sub>3</sub> /Carbon                                                                                         | <b>7.57</b>                        | <b>1.621</b>    | <b>84.05</b> | <b>10.31</b> | This work |
| FTO/c-TiO <sub>2</sub> /m-TiO <sub>2</sub> /CsPbBr <sub>3</sub> / Carbon                                                                                            | 7.40                               | 1.220           | 84.10        | 7.37         | 1         |
| FTO/c-TiO <sub>2</sub> /m-TiO <sub>2</sub> /GQDs/CsPbBr <sub>3</sub> /Carbon                                                                                        | 8.12                               | 1.458           | 82.1         | 9.72         | 2         |
| FTO/TiO <sub>2</sub> /CsPbBr <sub>3</sub> /SiQDs/spiro-OMeTAD/Ag                                                                                                    | 7.80                               | 1.420           | 75.00        | 8.31         | 3         |
| TiO <sub>2</sub> /CsPbBr <sub>3</sub> /Cu(Cr,Ba)O <sub>2</sub> NCs/Carbon                                                                                           | 7.81                               | 1.620           | 85.50        | 10.79        | 4         |
| FTO/TiO <sub>2</sub> /PTI-CsPbBr <sub>3</sub> /spiro-OMeTAD/Ag                                                                                                      | 9.78                               | 1.490           | 74.47        | 10.91        | 5         |
| FTO/c-TiO <sub>2</sub> /CsPbBr <sub>3</sub> /CsPbBr <sub>3</sub> -CsPb <sub>2</sub> Br <sub>5</sub> /CsPbBr <sub>3</sub> -Cs <sub>4</sub> PbBr <sub>6</sub> /Carbon | 9.24                               | 1.461           | 75.39        | 10.17        | 6         |
| FTO/Sb-TiO <sub>2</sub> /CsPbBr <sub>3</sub> /Carbon                                                                                                                | 6.70                               | 1.654           | 80.40        | 8.91         | 7         |
| FTO/TiO <sub>2</sub> -AC/CsPbBr <sub>3</sub> /ZnPc/Carbon                                                                                                           | 7.64                               | 1.606           | 82.47        | 10.12        | 8         |
| FTO/L-TiO <sub>2</sub> :MoSe <sub>2</sub> /CsPbBr <sub>3</sub> /Carbon                                                                                              | 6.70                               | 1.615           | 78.70        | 10.02        | 9         |
| FTO/c-TiO <sub>2</sub> /m-TiO <sub>2</sub> /CsPbBr <sub>3</sub> /Carbon                                                                                             | 7.13                               | 1.380           | 62.0         | 6.10         | 10        |
| FTO/c-TiO <sub>2</sub> /m-TiO <sub>2</sub> /Sm <sup>3+</sup> -CsPbBr <sub>3</sub> /Carbon                                                                           | 7.48                               | 1.594           | 85.10        | 10.14        | 11        |

---

|                                                                                               |       |       |       |       |    |
|-----------------------------------------------------------------------------------------------|-------|-------|-------|-------|----|
| FTO/c-TiO <sub>2</sub> /m-TiO <sub>2</sub> /Sr <sup>2+</sup> -CsPbBr <sub>3</sub> /<br>Carbon | 7.71  | 1.540 | 81.10 | 9.63  | 12 |
| FTO/TiO <sub>2</sub> /CQD-CsPbBr <sub>3</sub> IO/Spiro-<br>OMeTAD/Au                          | 11.34 | 1.060 | 69.00 | 8.29  | 13 |
| FTO/c-TiO <sub>2</sub> /CsPbBr <sub>3</sub> /Carbon                                           | 6.89  | 1.49  | 79.0  | 8.11  | 14 |
| FTO/c-TiO <sub>2</sub> /CsPbBr <sub>3</sub> /Ti <sub>3</sub> C <sub>2</sub> -MXene/<br>Carbon | 8.54  | 1.444 | 73.08 | 9.01  | 15 |
| FTO/c-TiO <sub>2</sub> /CsPbBr <sub>3</sub> /spiro-<br>OMeTAD/Au                              | 5.60  | 1.500 | 62.00 | 5.40  | 16 |
| FTO/c-TiO <sub>2</sub> /m-TiO <sub>2</sub> /CsPbBr <sub>3</sub> +L-<br>lysine/Carbon          | 7.64  | 1.565 | 81.0  | 9.68  | 17 |
| FTO/c-TiO <sub>2</sub> /m-TiO <sub>2</sub> /Sn <sup>2+</sup> -CsPbBr <sub>3</sub> /<br>Carbon | 7.66  | 1.370 | 82.22 | 8.63  | 18 |
| FTO/TiO <sub>2</sub> /CsPbBr <sub>3</sub> /MnS/Carbon                                         | 8.28  | 1.520 | 83.00 | 10.45 | 19 |
| FTO/c-TiO <sub>2</sub> /m-<br>TiO <sub>2</sub> /CsPbBr <sub>3</sub> /[BMMIm]Cl/Carbon         | 7.45  | 1.610 | 83.00 | 9.92  | 20 |

---

**Table S4.** The carrier lifetime parameters of perovskite films deposited on various TiO<sub>2</sub> ETLs.

| Samples  | $\tau_{\text{ave}}$ (ns) | $\tau_1$ (ns) | $A_1$ (%) | $\tau_2$ (ns) | $A_2$ (%) |
|----------|--------------------------|---------------|-----------|---------------|-----------|
| Pristine | 0.78                     | 0.69          | 54.33     | 13.95         | 45.67     |
| DAP-0.1  | 0.26                     | 0.37          | 62.85     | 7.63          | 37.15     |
| DAP-0.2  | 0.15                     | 0.22          | 61.92     | 5.31          | 38.08     |
| DAP-0.5  | 0.34                     | 0.45          | 63.36     | 8.74          | 36.64     |
| DAP-1    | 0.52                     | 0.61          | 64.18     | 10.96         | 35.82     |

The TRPL attenuation curve is fitted with a double exponential decay function:  $I = A_1 e^{-(\tau_1 - \tau_0)/\tau_1} + A_2 e^{-(\tau_1 - \tau_0)/\tau_2}$  to obtain the carrier lifetime, where  $\tau_1$  represents the faster defect-related non-radiation recombination,  $\tau_2$  represents the slower radiation recombination part.<sup>21</sup> Through the following formula:  $\tau_{\text{ave}} = (A_1 \tau_1^2 + A_2 \tau_2^2) / (A_1 \tau_1 + A_2 \tau_2)$ , the average lifetime ( $\tau_{\text{ave}}$ ) of photogenerated carriers can be obtained.

**Table S5.** EIS parameters of CsPbBr<sub>3</sub> PSCs with and without DAP modifier.

| Devices  | $R_s$ ( $\Omega$ cm <sup>2</sup> ) | $R_{rec}$ ( $\Omega$ cm <sup>2</sup> ) |
|----------|------------------------------------|----------------------------------------|
| Pristine | 16.37                              | 52.71                                  |
| DAP-0.1  | 11.02                              | 91.23                                  |
| DAP-0.2  | 6.94                               | 109.82                                 |
| DAP-0.5  | 14.06                              | 81.26                                  |
| DAP-1    | 14.80                              | 72.83                                  |

## References

1. D. Huang, P. Xie, Z. Pan, H. Rao and X. Zhong, *J. Mater. Chem. A*, 2019, **7**, 22420-22428.
2. J. Duan, Y. Zhao, B. He and Q. Tang, *Angew. Chem., Int. Ed. Engl.*, 2018, **57**, 3787-3791.
3. S. Zhou, R. Tang, H. Li, L. Fu, B. Li and L. Yin, *J. Power Sources*, 2019, **439**, 227065.
4. J. Duan, Y. Zhao, Y. Wang, X. Yang and Q. Tang, *Angew. Chem., Int. Ed.*, 2019, **58**, 16147-16151.
5. G. Tong, T. Chen, H. Li, L. Qiu, Z. Liu, Y. Dang, W. Song, L. K. Ono, Y. Jiang and Y. Qi, *Nano Energy*, 2019, **65**, 104015.
6. G. Tong, T. Chen, H. Li, W. Song, Y. Chang, J. Liu, L. Yu, J. Xu, Y. Qi and Y. Jiang, *Sol. RRL*, 2019, **3**, 1900030.
7. Y. Xu, J. Duan, X. Yang, J. Du, Y. Wang, Y. Duan and Q. Tang, *J. Mater. Chem. A*, 2020, **8**, 11859-11866.
8. J. Zhu, M. Tang, B. He, W. Zhang, X. Li, Z. Gong, H. Chen, Y. Duan and Q. Tang, *J. Mater. Chem. A*, 2020, **8**, 20987-20997.
9. Q. Zhou, J. Du, J. Duan, Y. Wang, X. Yang, Y. Duan and Q. Tang, *J. Mater. Chem. A*, 2020, **8**, 7784-7791.
10. J. Liu, L. Zhu, S. Xiang, Y. Wei, M. Xie, H. Liu, W. Li and H. Chen, *Sustain. Energ. Fuels*, 2019, **3**, 184-194.
11. J. Duan, Y. Zhao, X. Yang, Y. Wang, B. He and Q. Tang, *Adv. Energy Mater.*,

- 2018, **8**, 1802346.
12. Y. Zhao, Y. Wang, J. Duan, X. Yang and Q. Tang, *J. Mater. Chem. A*, 2019, **7**, 6877-6882.
13. S. Zhou, R. Tang and L. Yin, *Adv. Mater.*, 2017, **29**, 1703682-1703690.
14. X. Wan, Z. Yu, W. Tian, F. Huang, S. Jin, X. Yang, Y. B. Cheng, A. Hagfeldt and L. Sun, *J. Energy Chem.*, 2020, **46**, 8-15.
15. T. Chen, G. Tong, E. Xu, H. Li, P. Li, Z. Zhu, J. Tang, Y. Qi and Y. Jiang, *J. Mater. Chem. A*, 2019, **7**, 20597-20603.
16. Q. A. Akkerman, M. Gandini, F. Di Stasio, P. Rastogi, F. Palazon, G. Bertoni, J. M. Ball, M. Prato, A. Petrozza and L. Manna, *Nat. Energy*, 2016, **2**, 16194.
17. W. Zhang, X. Liu, B. He, J. Zhu, X. Li, K. Shen, H. Chen, Y. Duan and Q. Tang, *ACS Appl. Mater. Interfaces*, 2020, **12**, 36092-36101.
18. H. Guo, Y. Pei, J. Zhang, C. Cai, K. Zhou and Y. Zhu, *J. Mater. Chem. C*, 2019, **7**, 11234-11243.
19. X. Li, Y. Tan, H. Lai, S. Li, Y. Chen, S. Li, P. Xu and J. Yang, *ACS Appl. Mater. Interfaces*, 2019, **11**, 29746-29752.
20. W. Zhang, X. Liu, B. He, Z. Gong, J. Zhu, Y. Ding, H. Chen and Q. Tang, *ACS Appl Mater Interfaces*, 2020, **12**, 4540-4548.
21. X. Cao, G. Zhang, Y. Cai, L. Jiang, W. Yang, W. Song, X. He, Q. Zeng, Y. Jia and J. Wei, *Green Chem.*, 2021, **23**, 470-478.
